# Supplementary material
Source: PubMed Central journal article supplement (PMC9832826)
Supplement: EMMM-15-e17061-s001.pdf [file EMMM-15-e17061-s001.pdf]

# **Enriched environment enhances b-adrenergic signaling to prevent microglia inflammation by amyloid-b**

Huixin Xu, Molly M. Rajsombath, Pia Weikop, Dennis J. Selkoe

## Appendix

### Table of contents:

1. Figure S1. Cytokine profile of human AD brain extract vs immunodepleted and control brain extract
2. Figure S2. FITC-A $\beta$ 42 distributes equally in both ventricles after unilateral i.c.v. injection.
3. Figure S3-S5. Microglia images presented with split channels corresponding to Figure 1, 3, and 6.
4. Figure S6. The full blot view of b2AR western blot presented in Figure 7.
5. Table S1-S10. Exact *p* values from each main figure and Expanded View figure.

**Figure S1.**

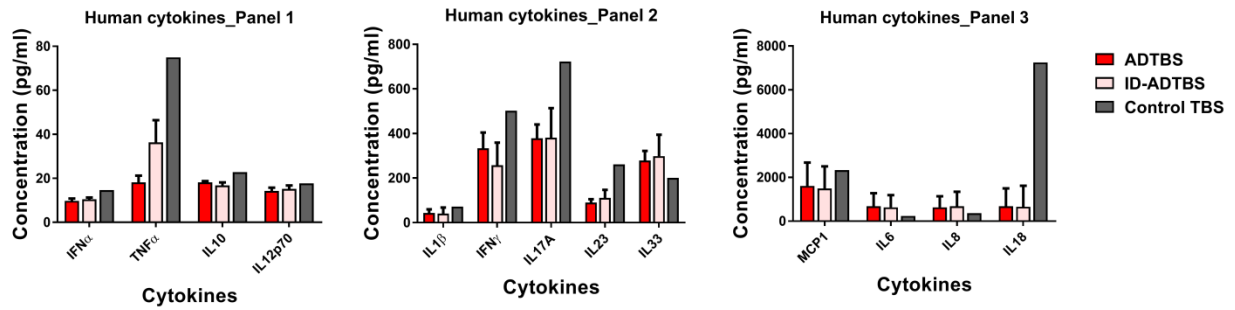

**Figure S1.** LEGNEDplex<sup>TM</sup> analysis showed no significant difference between ADTBS and ID-ADTBS. Control TBS extracts from healthy human brain contained no less cytokines than TBS extracts from AD patients' brains.

**Figure S2.**

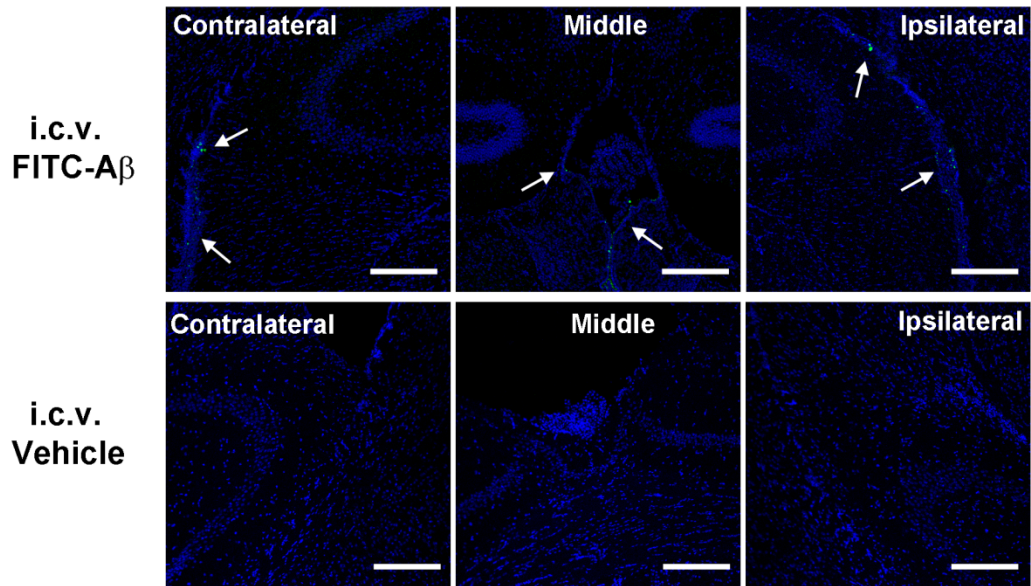

**Figure S2.** Confocal images on brain sections post intracerebral ventricular injection of FITC-A $\beta$ . FITC signal (green) can be detected on ipsilateral and contralateral ventricles as well as the middle region, as pointed out by white arrows. Brains receiving only vehicle injection showed no positive FITC signals. Scale bar = 200  $\mu$ m.

**Figure S3.**

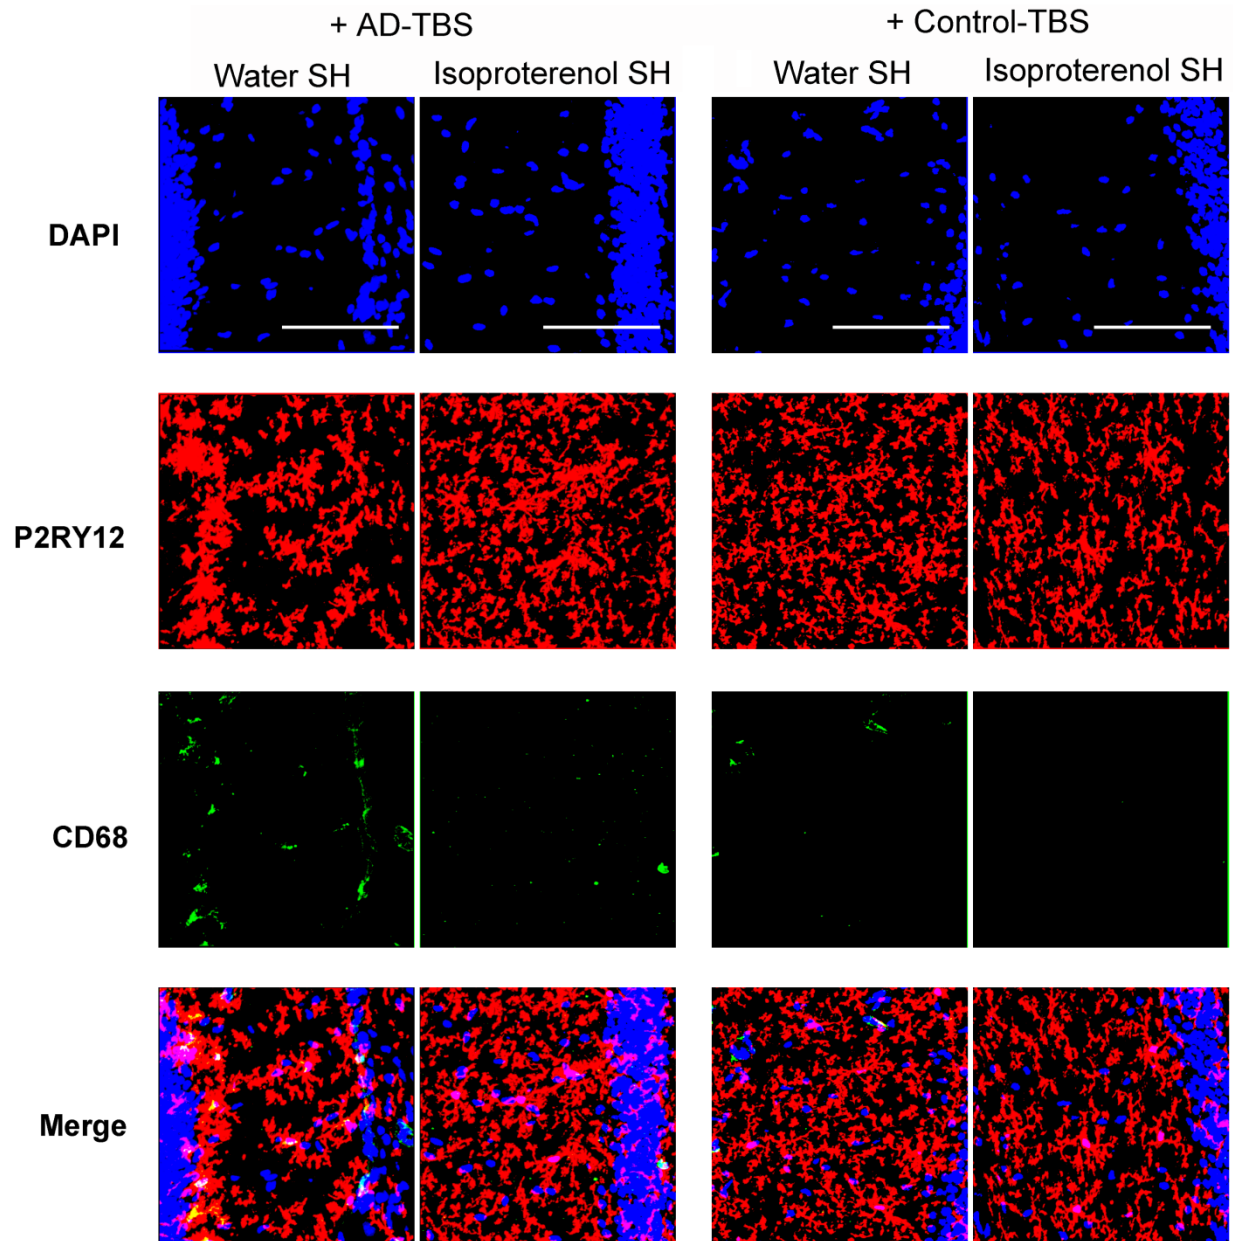

**Figure S3.** Display of single channel and merged images from panels presented in Figure 1. Scale bar = 100  $\mu$ m (same in all panels).

Figure S4.

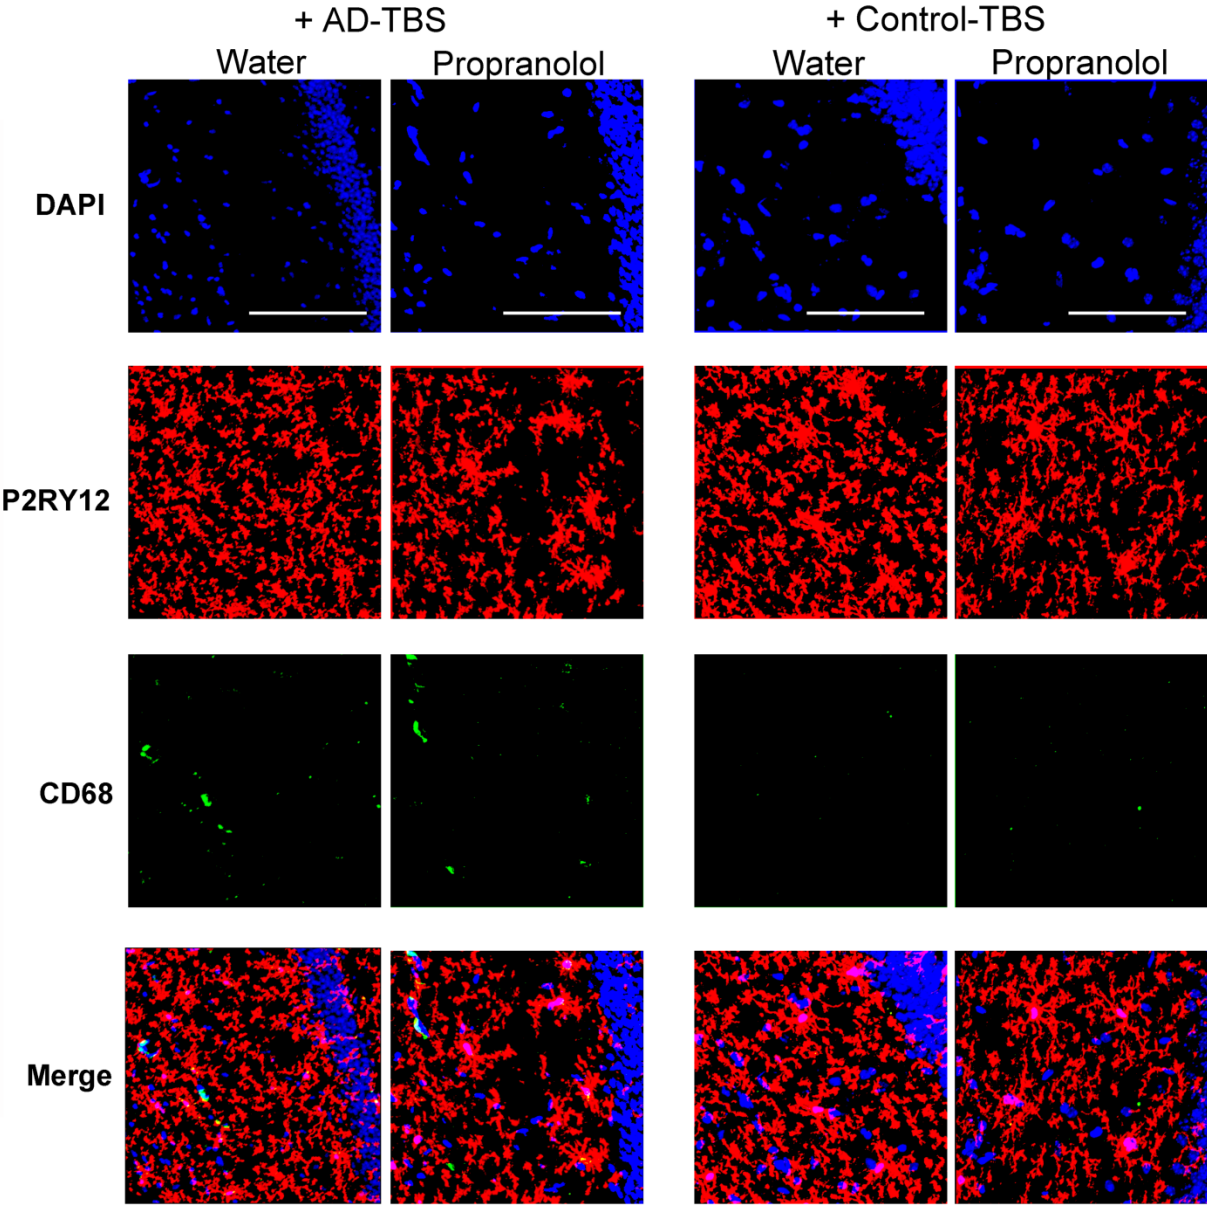

Figure S4. Display of single channel and merged images from panels presented in Figure 3. Scale bar = 100  $\mu$ m (same in all panels).

Figure S5. \*

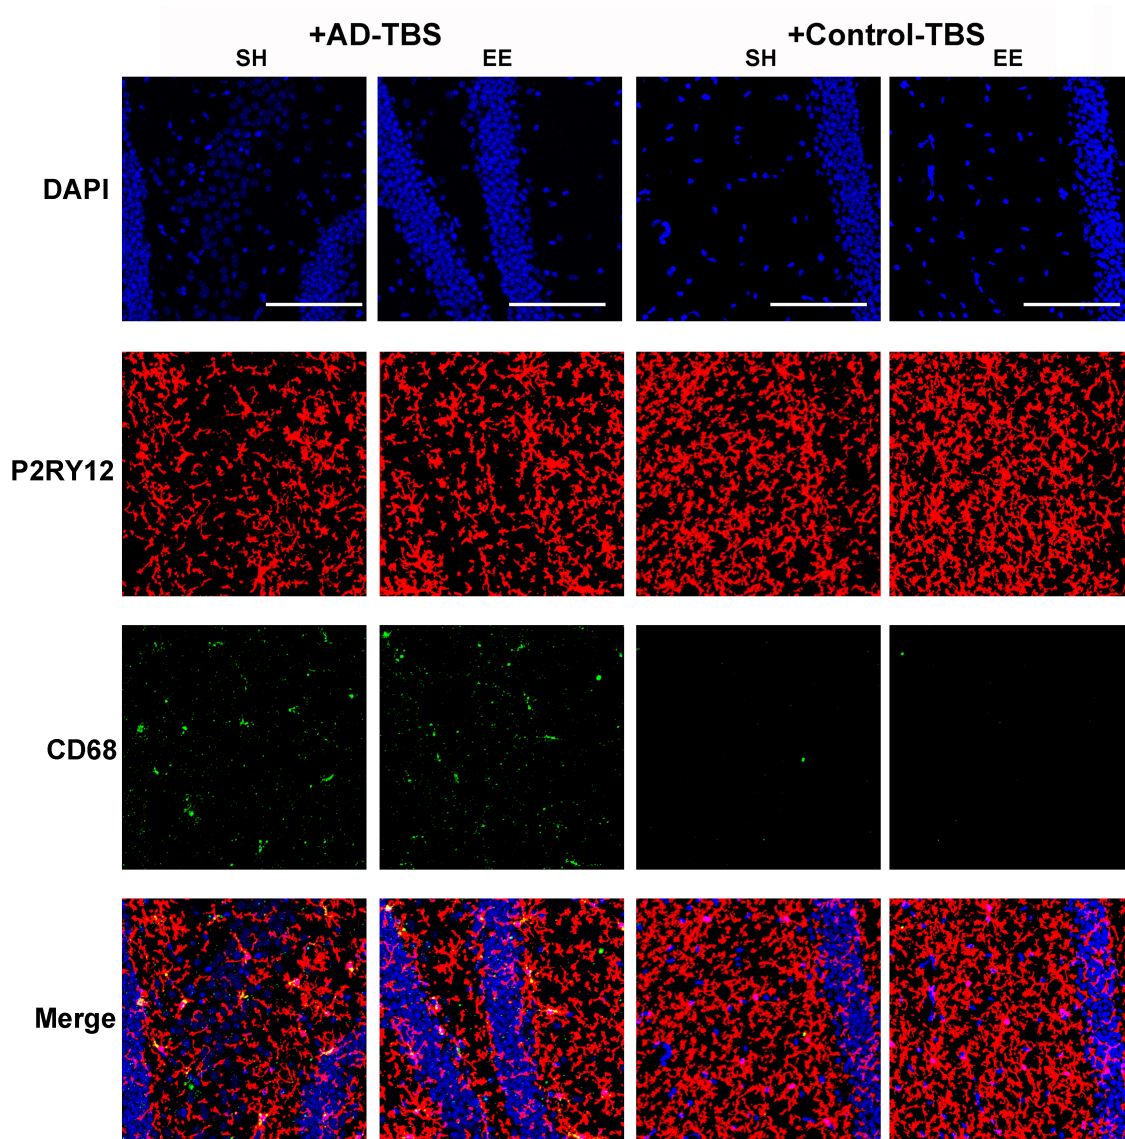

**Figure S5.** Display of single channel and merged images from panels presented in Figure 6. Scale bar = 100  $\mu\text{m}$  (same in all panels).

\* Correction added after first online publication: Appendix Figure S5 has been corrected. See the associated Corrigendum at <https://doi.org/10.15252/emmm.202217061>

**Figure S6.**

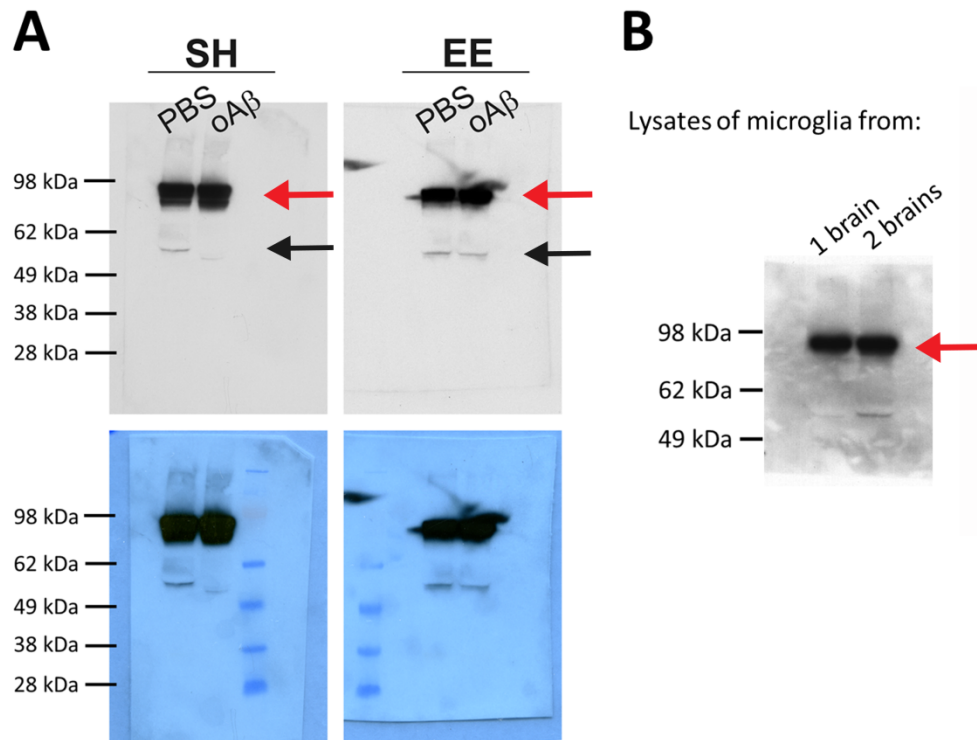

**Figure S6.** A) Original western blots of  $\beta$ 2AR shows bands (black arrow) at correct molecular weight zone. The protein is predicted as 46 kDa but migrates between 50 kDa and 75 kDa as Abcam datasheet shows. Bottom panels were acquired by overlaying developed films with blots to visualize molecular weight markers. B) The high intensity bands at higher molecular weight (red arrow) are non-specific signals that do not respond to changes in loading amount (total microglia cell lysates prepared from 1 brain vs 2 brains).

**Table S1.** *p* values from Figure 1C. Results not significant (*p*>0.05) are not listed.

|                            | SH water<br>(AD/ctrl) | SH isoproterenol<br>(AD/Ctrl) | Water/Isoproterenol<br>(Ctrl) | Water/Isoproterenol<br>(AD) |
|----------------------------|-----------------------|-------------------------------|-------------------------------|-----------------------------|
| #microglia/mm <sup>2</sup> | 2.93E-06              | /                             | 3.48E-06                      | 3.96E-08                    |
| Circularity                | 0.028                 | /                             | /                             | 0.0057                      |
| Solidity                   | 0.012                 | /                             | /                             | 0.0043                      |
| %CD68/microglia            | 0.0026                | /                             | /                             | 0.011                       |
| #Branch/microglia          | 0.0024                | /                             | /                             | 0.0017                      |

**Table S2.** *p* values from Figure 2B&C.

| Gene     | Correction | <i>p</i> | Gene    | Correction | <i>p</i> |
|----------|------------|----------|---------|------------|----------|
| Mef2a    | Yes        | 1.29E-06 | Myd88   | No         | 0.0011   |
| Ccl2     | Yes        | 2.51E-07 | Ripk2   | No         | 0.0039   |
| Tnf      | Yes        | 2.46E-05 | Tlr3    | No         | 0.0019   |
| Ifi44    | Yes        | 3.33E-05 | Cxcl10  | No         | 0.0043   |
| Ccl4     | Yes        | 2.06E-07 | Nfatc3  | No         | 0.0024   |
| Ccl3     | Yes        | 4.94E-06 | Mx1     | No         | 0.0030   |
| Rock2    | Yes        | 0.00017  | Nr3c1   | No         | 0.0022   |
| Tlr4     | Yes        | 1.58E-05 | Mapk8   | No         | 0.0041   |
| Prkcb    | Yes        | 0.00045  | Map3k5  | No         | 0.0030   |
| Il18     | Yes        | 2.8E-06  | Cysltr1 | No         | 0.0023   |
| Ptger3   | Yes        | 1.12E-05 | Myc     | No         | 0.0194   |
| C1qb     | Yes        | 5.01E-06 | Tlr1    | No         | 0.022    |
| Raf1     | Yes        | 0.000207 | Tcf4    | No         | 0.0048   |
| Mapkapk2 | Yes        | 4.68E-05 | Il10rb  | No         | 0.00158  |
| Jun      | Yes        | 2.77E-05 | Il1a    | No         | 0.016    |
| Tlr6     | Yes        | 3.48E-06 | Stat1   | No         | 0.00094  |
| Irf1     | Yes        | 4.85E-06 | Tlr9    | No         | 0.00069  |
| Gnaq     | Yes        | 0.00018  | Irf5    | No         | 0.013    |
| Mef2c_Mm | Yes        | 0.00010  | Stat2   | No         | 0.0037   |
| Map2k1   | Yes        | 8.98E-05 |         |            |          |
| Cdc42    | Yes        | 1.64E-05 |         |            |          |
| Ptgs1    | Yes        | 9.18E-06 |         |            |          |
| Nfe2l2   | Yes        | 6.44E-05 |         |            |          |
| Tgfb1    | Yes        | 1.35E-05 |         |            |          |
| Rhoa     | Yes        | 0.00014  |         |            |          |
| Myl2     | Yes        | 0.00022  |         |            |          |
| C1qa     | Yes        | 5.26E-05 |         |            |          |
| Tgfb1    | Yes        | 0.00026  |         |            |          |
| Stat3    | Yes        | 0.00018  |         |            |          |



**Table S3.** *p* values from Figure 3C. Results not significant ( $p>0.05$ ) are not listed.

|                            | EE water<br>(AD/ctrl) | EE propranolol<br>(AD/Ctrl) | Water/Propranolol<br>(Ctrl) | Water/Propranolol<br>(AD) |
|----------------------------|-----------------------|-----------------------------|-----------------------------|---------------------------|
| #microglia/mm <sup>2</sup> | /                     | 5.09E-06                    | 3.86E-05                    | 8.12E-08                  |
| Circularity                | 0.00058               | 0.00032                     | /                           | 0.0018                    |
| Solidity                   | /                     | 0.00060                     | /                           | 0.0043                    |
| %CD68/microglia            | 0.0011                | 0.00071                     | /                           | 0.011                     |
| #Branch/microglia          | 0.0024                | /                           | /                           | 0.0017                    |

**Table S4.** *p* values from Figure 4B&C.

| Gene     | Correction | <i>p</i> | Gene   | Correction | <i>p</i> |
|----------|------------|----------|--------|------------|----------|
| H2-Eb1   | Yes        | 6.79E-07 | Iigp1  | No         | 0.00070  |
| Ifi2712a | Yes        | 3.85E-06 | Irf7   | No         | 0.00077  |
| Stat1    | Yes        | 1.09E-05 | Ifit2  | No         | 0.00071  |
| Ifit3    | Yes        | 6.75E-05 | Ccl24  | No         | 0.0034   |
| Ccl4     | Yes        | 1.58E-05 | Ifi44  | No         | 0.00056  |
| Ccl3     | Yes        | 0.000321 | Cxcl10 | No         | 0.0012   |
| Ly96     | Yes        | 2.97E-05 | Ddit3  | No         | 0.0057   |
| Tlr3     | Yes        | 0.00011  | Irf1   | No         | 0.020    |
| Ccl2     | Yes        | 7.62E-05 | Ltb    | No         | 0.00099  |
| Tyrobp   | Yes        | 2.95E-05 | Stat2  | No         | 0.011    |
| Stat3    | Yes        | 7.08E-06 | Tnf    | No         | 0.012    |
| Mafg     | Yes        | 1.14E-05 | Ptger3 | No         | 0.010    |
| Mef2a    | Yes        | 0.00013  | C4a    | No         | 0.0012   |
|          |            |          | Trem2  | No         | 0.0015   |
|          |            |          | Gnas   | No         | 0.0025   |
|          |            |          | Limk1  | No         | 0.00049  |
|          |            |          | Myc    | No         | 0.0017   |
|          |            |          | Hmgb2  | No         | 0.0014   |
|          |            |          | Hdac4  | No         | 0.012    |

**Table S5.** *p* values from Figure 5A&B.

| SH water vs isoproterenol |          | EE water vs propranolol |          |
|---------------------------|----------|-------------------------|----------|
| Gene                      | <i>p</i> | Gene                    | <i>p</i> |
| Ccl2                      | 0.00095  | Ccl2                    | 1.25E-08 |
| Ccl3                      | 4.39E-05 | Ccl3                    | 3.61E-05 |
| Ccl4                      | 7.33E-05 | Ccl4                    | 1.73E-07 |
| Cxcl10                    | 1.06E-10 | Cxcl10                  | 0.0016   |
| Tnf                       | 3.65E-06 | Tnf                     | 1.34E-09 |

**Table S6.** *p* values from Figure 6B. Results not significant ( $p>0.05$ ) are not listed.

|                            | SH AD/Ctrl | EE AD/Ctrl |
|----------------------------|------------|------------|
| #microglia/mm <sup>2</sup> | 0.0089     | 0.0011     |
| Circularity                | 0.00014    | 0.019      |
| Solidity                   | 0.046      | 0.017      |
| %CD68/microglia            | 0.0088     | 0.019      |
| #Branch/microglia          | 0.0070     | 0.00047    |

**Table S7.** *p* values from Figure 7F. Results not significant ( $p>0.05$ ) are not listed.

|        | DMEM/oA $\beta$ | oA $\beta$ /oA $\beta$ +iso | oA $\beta$ +iso / oA $\beta$ +iso+cAMP-Rp |
|--------|-----------------|-----------------------------|-------------------------------------------|
| Ccl2   | 0.0035          | 0.0045                      | /                                         |
| Ccl3   | 0.0044          | 0.00020                     | /                                         |
| Ccl4   | 0.0016          | 5.67E-05                    | /                                         |
| Cxcl10 | 0.028           | 0.0068                      | /                                         |
| Tnf    | 0.0066          | 0.00032                     | 0.0038                                    |

**Table S8.** *p* values from Figure EV2.

| Cytokine | <i>p</i>  |
|----------|-----------|
| CCL2     | 0.001547  |
| CCL3     | 0.0071772 |
| CCL4     | 0.0141576 |
| CXCL10   | 0.0057565 |

**Table S9.** *p* values from Figure EV3.

| Gene   | <i>p</i> |
|--------|----------|
| Ccl2   | 3.07E-07 |
| Ccl3   | 2.10E-05 |
| Ccl4   | 6.22E-05 |
| Cxcl10 | 0.028    |
| Tnf    | 0.0015   |

**Table S10.** *p* values from Figure EV5.

|                   | SH AD/Ctrl | EE AD/Ctrl |
|-------------------|------------|------------|
| Circularity       | 0.0040     | 0.0016     |
| Solidity          | 0.0059     | 0.037      |
| %CD68/microglia   | 0.0022     | 0.0072     |
| #Branch/microglia | 0.0022     | 0.0012     |
